# Supplementary material for: A Common CDH13 Variant Is Associated with Low Agreeableness and Neural Responses to Working Memory Tasks in ADHD
Source: MDPI journal article supplement (doi:10.3390/genes12091356), 2021-08-29
Supplement: s1 [file s1]

## Supplementary Information

# A Common *CDH13* Variant is Associated with Low Agreeableness and Neural Responses to Working Memory Tasks in ADHD

Georg C. Ziegler <sup>1,2,\*</sup>, Ann-Christine Ehlis <sup>3</sup>, Heike Weber <sup>1</sup>, Maria Rosaria Vitale <sup>2,14</sup>, Johanna E. M. Zöllner <sup>2</sup>, Hsing-Ping Ku <sup>2</sup>, Miriam A. Schiele <sup>4</sup>, Laura I. Kürbitz <sup>5</sup>, Marcel Romanos <sup>6</sup>, Paul Pauli <sup>7</sup>, Raffael Kalisch <sup>8,9</sup>, Peter Zwanzger <sup>10,11</sup>, Katharina Domschke <sup>4</sup>, Andreas J. Fallgatter <sup>3</sup>, Andreas Reif <sup>12</sup> and Klaus-Peter Lesch <sup>2,13,14</sup>

- <sup>1</sup> Department of Psychiatry, Psychosomatics and Psychotherapy, Center of Mental Health, University of Würzburg, 97080 Würzburg, Germany; weber\_h2@ukw.de
  - <sup>2</sup> Division of Molecular Psychiatry, Center of Mental Health, University of Würzburg, 97080 Würzburg, Germany; vitale\_m@ukw.de (M.R.V.); zoeller\_j1@ukw.de (J.E.M.Z.); ku\_h@ukw.de (H.-P.K.); kplesch@mail.uni-wuerzburg.de (K.-P.L.)
  - <sup>3</sup> Department of Psychiatry and Psychotherapy, Tübingen Center for Mental Health (TüCMH), University of Tübingen, 72076 Tübingen, Germany; ann-christine.ehlis@med.uni-tuebingen.de (A.-C.E.); andreas.fallgatter@med.uni-tuebingen.de (A.J.F.)
  - <sup>4</sup> Department of Psychiatry and Psychotherapy, Medical Center—University of Freiburg, Faculty of Medicine, University of Freiburg, 79104 Freiburg, Germany; miriam.schiele@uniklinik-freiburg.de (M.A.S.); katharina.domschke@uniklinik-freiburg.de (K.D.)
  - <sup>5</sup> Center of Psychosocial Medicine, Institute for Sex Research, Sexual Medicine and Forensic Psychiatry, University Medical Center Hamburg-Eppendorf, 20246 Hamburg, Germany; l.kuerbitz@uke.de
  - <sup>6</sup> Department of Child and Adolescent Psychiatry, Psychosomatics and Psychotherapy, University of Würzburg, 97080 Würzburg, Germany; romanos\_m@ukw.de
  - <sup>7</sup> Department of Psychology I, University of Würzburg, 97070 Würzburg, Germany; pauli@psychologie.uni-wuerzburg.de
  - <sup>8</sup> Neuroimaging Center (NIC), Focus Program Translational Neuroscience (FTN), Johannes Gutenberg University Medical Center, 55131 Mainz, Germany; rkalisch@uni-mainz.de
  - <sup>9</sup> Department of Systems Neuroscience, University Medical Center Hamburg-Eppendorf, 20246 Hamburg, Germany
  - <sup>10</sup> kbo-Inn-Salzach-Klinikum, 83512 Wasserburg am Inn, Germany; peter.zwanzger@kbo.de
  - <sup>11</sup> Department of Psychiatry, Ludwig-Maximilian-University of Munich, 80336 Munich, Germany
  - <sup>12</sup> Department of Psychiatry, Psychosomatic Medicine and Psychotherapy, University Hospital Frankfurt, 60528 Frankfurt am Main, Germany; andreas.reif@kgu.de
  - <sup>13</sup> Department of Translational Neuroscience, School for Mental Health and Neuroscience (MHeNS), Maastricht University, 6229 ER Maastricht, The Netherlands
  - <sup>14</sup> Laboratory of Psychiatric Neurobiology, Institute of Molecular Medicine, Sechenov First Moscow State Medical University, 119991 Moscow, Russia
- \* Correspondence: ziegler\_g@ukw.de; +49-931-201-76387

### Cycling conditions

|                                    |         |
|------------------------------------|---------|
| House-made Goldstar 10x Master Mix | 2.5 µl  |
| MgCl <sub>2</sub> (25mM)           | 1.0 µl  |
| 2,5 mM Nucleotides each            | 1.0 µl  |
| Primer-hu-Cdh13-F (10µM)           | 1.0 µl  |
| Primer-hu-Cdh13-R (10µM)           | 1.0 µl  |
| House-made Taq polymerase          | 0.3 µl  |
| DNA-Template 1:10                  | 1.0 µl  |
| ddH <sub>2</sub> O                 | 17.2 µl |
| Endvolumen                         | 25.0 µl |

### Rs2199430 primers

Hu-CDH13-rs2199430-F: 5'-AGACATCAGAGGCATTTCCAGG-3'

Hu-CDH13-rs2199430-R: 5'-TCTCCACGTCTTTGTGGTGC-3'

Digest with NEB BbsI-HF #R3539 leads to expected products of the following sizes:

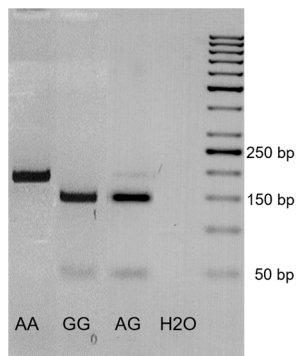

rs2199430 AA 185bp  
rs2199430 AG 43bp+142kb+185kb  
rs2199430 GG 43bp+142bp

**Supplementary Table S1:** Cycling conditions, primers, and agarose gel image depicting the expected band sizes of the digested PCR product for rs2199430 genotyping

|                   | <b>AA</b> | <b>AG</b> | <b>GG</b> | <b>sum</b> |
|-------------------|-----------|-----------|-----------|------------|
| <b>n controls</b> | 481       | 516       | 136       | 884        |
| %                 | 43.0      | 45.4      | 11.7      | 100        |
| <b>n aADHD</b>    | 432       | 467       | 99        | 998        |
| %                 | 43.4      | 46.8      | 9.9       | 100        |

**Supplementary Table S2:** rs2199430 genotype distribution in the adult ADHD and control sample. A  $\chi^2$ -Test showed no significant association of rs2199430 genotype with disease category (aADHD vs. healthy controls,  $p = 0.31$ ).

| <i>NEO-PI-R</i>   | <i>rs2199430</i><br><i>genotype</i> | <i>n</i> | <i>descriptives</i>    | <i>F-statistics</i>       | <i>p-value</i> |
|-------------------|-------------------------------------|----------|------------------------|---------------------------|----------------|
| neuroticism       | AA                                  | 378      | M = 117.3<br>SD = 25.5 | F <sub>2,871</sub> = 1.35 | .260           |
|                   | AG                                  | 410      | M = 115.1<br>SD = 24.7 |                           |                |
|                   | GG                                  | 88       | M = 118.8<br>SD = 22.8 |                           |                |
| extraversion      | AA                                  | 378      | M = 99.7<br>SD = 22.8  | F <sub>2,875</sub> = 0.92 | .398           |
|                   | AG                                  | 410      | M = 101.5<br>SD = 22.5 |                           |                |
|                   | GG                                  | 89       | M = 98.9<br>SD = 19.8  |                           |                |
| openness          | AA                                  | 382      | M = 111.9<br>SD = 20.7 | F <sub>2,875</sub> = 0.13 | .879           |
|                   | AG                                  | 409      | M = 112.6<br>SD = 19.7 |                           |                |
|                   | GG                                  | 89       | M = 111.9<br>SD = 17.4 |                           |                |
| conscientiousness | AA                                  | 381      | M = 90.8<br>SD = 23.1  | F <sub>2,875</sub> = 0.06 | .942           |
|                   | AG                                  | 410      | M = 90.6<br>SD = 20.4  |                           |                |
|                   | GG                                  | 89       | M = 89.7<br>SD = 20.4  |                           |                |
| agreeableness     | AA                                  | 377      | M = 112.8<br>SD = 16.5 | F <sub>2,871</sub> = 5.04 | <b>.007</b>    |
|                   | AG                                  | 411      | M = 112.3<br>SD = 16.7 |                           |                |
|                   | GG                                  | 88       | M = 107.4<br>SD = 16.8 |                           |                |

**Supplementary Table S3:** F-statistics for the *Big Five* personality traits with rs2199430 genotype as independent variable in the aADHD cohort revealing a significant association of

rs2199430 genotype with NEO-PI-R agreeableness scores while the other dimensions remained non-significant.
